# Supplementary material
Source: PubMed Central journal article supplement (PMC4451048)
Supplement: supp_WNL.0000000000001606_e-Methods.pdf [file supp_WNL.0000000000001606_e-Methods.pdf]

## Supplemental Methods:

### Genotyping:

For each study in the IHGC migraine analysis, investigators independently performed genome-wide single nucleotide polymorphism (SNP) genotyping using standard technologies and imputed to HapMap release 21 or 22 CEU phased genotype reference panels.<sup>1</sup> Investigators then contributed summary statistic data from association analyses performed using a frequentist additive model based on an expected allelic dosage model for SNP markers, adjusting for sex, age and relatedness where appropriate. SNPs were filtered on per-study levels based on inclusion criteria of minor allele frequencies (MAF) $>0.1\%$  and imputation quality measures of  $IA > 0.6$  (IMPUTE 2<sup>2</sup>) or  $r^2 > 0.3$  (MaCH<sup>3</sup>). Combined association data for about 2.5 million imputed and genotyped autosomal SNPs were meta-analyzed in a fixed-effects model using GWAMA software.<sup>4</sup> At this stage, SNPs with a heterogeneity coefficient  $I^2$  exceeding 75% or presence in less than five studies were filtered out. In the meta-analysis, there was little evidence of population stratification at the study level (each genomic inflation factor  $\lambda \leq 1.1$ ), though moderate inflation was observed at the meta-analysis level ( $\lambda = 1.13$ ).

In METASTROKE, each cohort was independently genotyped using an Affymetrix or Illumina platform and then performed imputation to the HapMap release 21/22 or the 1000 Genomes reference panels. Association analysis for each study was performed using a log-additive model frequentist test, accounting for the uncertainty of imputed genotypes. Several studies used principal component analysis (PCA) values as covariates in their analyses.<sup>5</sup> Central quality control used

previously agreed upon criteria including check of consistency of the given alleles across all studies, quality of the imputation, deviation from Hardy-Weinberg equilibrium in the controls, minor allele frequency, and call rate. Individual METASTROKE results of association analyses from every center were analyzed using a fixed-effects inverse-variance weighted model with METAL.<sup>6</sup>

## References

1. International HapMap Consortium, Frazer KA, Ballinger DG, et al. A second generation human haplotype map of over 3.1 million SNPs. *Nature* 2007;449:851-861.
2. Howie BN, Donnelly P, Marchini J. A flexible and accurate genotype imputation method for the next generation of genome-wide association studies. *PLoS genetics* 2009;5:e1000529.
3. Li Y, Willer CJ, Ding J, Scheet P, Abecasis GR. MaCH: using sequence and genotype data to estimate haplotypes and unobserved genotypes. *Genetic epidemiology* 2010;34:816-834.
4. Magi R, Morris AP. GWAMA: software for genome-wide association meta-analysis. *BMC bioinformatics* 2010;11:288.
5. Traylor M, Farrall M, Holliday EG, et al. Genetic risk factors for ischaemic stroke and its subtypes (the METASTROKE collaboration): a meta-analysis of genome-wide association studies. *Lancet neurology* 2012;11:951-962.
6. Willer CJ, Li Y, Abecasis GR. METAL: fast and efficient meta-analysis of genomewide association scans. *Bioinformatics* 2010;26:2190-2191.
