# Supplementary material
Source: PubMed Central journal article supplement (PMC4451048)
Supplement: supp_WNL.0000000000001606_Figure_e-1.pdf [file supp_WNL.0000000000001606_Figure_e-1.pdf]

(A)

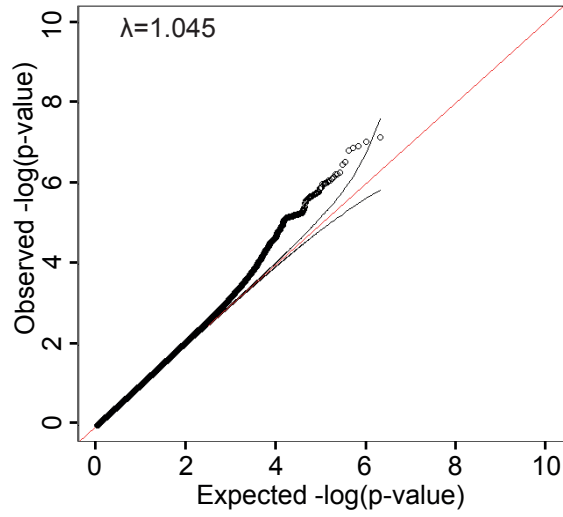

(B)

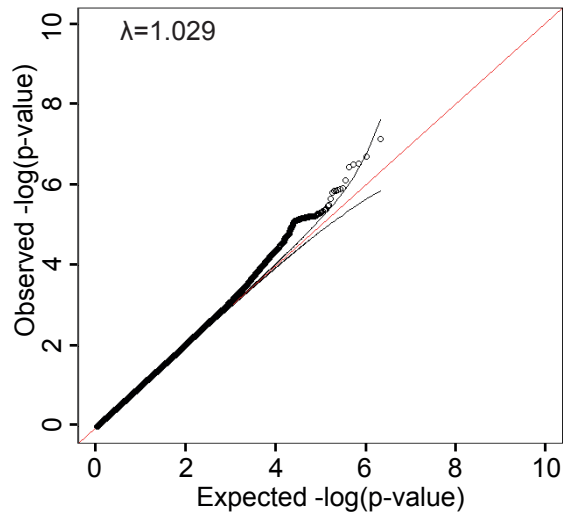

(C)

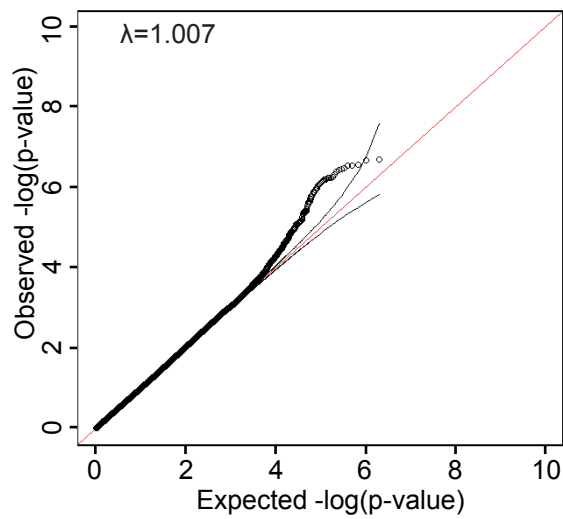

Figure e1: Quantile-Quantile Plots for meta-analyses of migraine and stroke. Data are presented for (A) All migraine vs. all ischemic stroke (B) migraine without aura vs. all ischemic stroke, and (C) migraine with aura vs. all ischemic stroke. The lambda parameter given shows the genomic inflation.
