# Supplementary material
Source: PubMed Central journal article supplement (PMC4451048)
Supplement: supp_WNL.0000000000001606_Table_e-1.pdf [file supp_WNL.0000000000001606_Table_e-1.pdf]

**Table e-1:** Description of migraine cohorts used in the analysis. For an in-depth overview, refer to the original publication (Anttila et al., Nat Genet, 2013).

| <b>Cohort Name</b>   | <b>Number of cases</b> | <b>Number of controls</b> | <b>MO cases</b> | <b>MA cases</b> |
|----------------------|------------------------|---------------------------|-----------------|-----------------|
| <b>ALSPAC</b>        | 3,134                  | 5,103                     | -               | -               |
| <b>Australia</b>     | 1,683                  | 2,383                     | -               | -               |
| <b>B58C</b>          | 1,165                  | 4,141                     | -               | -               |
| <b>deCODE</b>        | 2,139                  | 34,617                    | 537             | 120             |
| <b>ERF</b>           | 330                    | 1,216                     | 189             | 141             |
| <b>Finnish MA</b>    | 1,032                  | 3,513                     | -               | 1,032           |
| <b>Finn Twin</b>     | 189                    | 580                       | -               | -               |
| <b>German MA</b>     | 997                    | 1,105                     | -               | 997             |
| <b>German MO</b>     | 1,208                  | 2,564                     | 1,208           | -               |
| <b>HUNT</b>          | 1,608                  | 1,097                     | 1,175           | 359             |
| <b>LUMINA MA</b>     | 820                    | 4,774                     | -               | 820             |
| <b>LUMINA MO</b>     | 1,118                  | 2,016                     | 1,118           | -               |
| <b>NFBC1966</b>      | 757                    | 4,399                     | -               | -               |
| <b>NTR&amp;NESDA</b> | 282                    | 2,260                     | 154             | 103             |
| <b>Rotterdam</b>     | 351                    | 1,647                     | 275             | 76              |
| <b>Twins-UK</b>      | 972                    | 3,837                     | 468             | 235             |
| <b>WGHS</b>          | 5,122                  | 18,108                    | 1,826           | 1,177           |
| <b>Young Finns</b>   | 378                    | 2,065                     | 157             | 58              |

Abbreviations: MO = migraine without aura; MA = migraine with aura.
