# Supplementary material
Source: PubMed Central journal article supplement (PMC4451048)
Supplement: supp_WNL.0000000000001606_Table_e-2.pdf [file supp_WNL.0000000000001606_Table_e-2.pdf]

**Table e-2:** Description of ischemic stroke cohorts used in the analysis. For an in-depth overview, refer to the original publication (Traylor et al., Lancet Neurol, 2012).

| <b>Cohort Name</b> | <b>Number of all IS cases</b> | <b>Number of controls</b> | <b>Number of LAS cases</b> | <b>Number of CE cases</b> | <b>Number of SVD cases</b> |
|--------------------|-------------------------------|---------------------------|----------------------------|---------------------------|----------------------------|
| ARIC               | 385                           | 8,803                     | 31                         | 93                        | 63                         |
| ASGC               | 1,162                         | 1,244                     | 421                        | 240                       | 310                        |
| BRAINS             | 361                           | 444                       | 120                        | 29                        | 97                         |
| CHS                | 454                           | 2,817                     | -                          | 147                       | 73                         |
| deCODE             | 2,391                         | 26,970                    | 255                        | 399                       | 240                        |
| FHS                | 171                           | 4,164                     | -                          | 48                        | -                          |
| MGH/GASROS         | 516                           | 1,202                     | 95                         | 169                       | 38                         |
| GEOS               | 448                           | 498                       | 37                         | 90                        | 54                         |
| HPS                | 578                           | 468                       | -                          | -                         | -                          |
| HVH                | 566                           | 1,290                     | 61                         | 88                        | 173                        |
| MILANO             | 372                           | 407                       | 74                         | 65                        | 25                         |
| ROTTERDAM          | 367                           | 5,396                     | -                          | -                         | -                          |
| ISGS/SWISS         | 1,070                         | 2,329                     | 229                        | 247                       | 201                        |
| WTCCC2-D           | 1,174                         | 797                       | 346                        | 330                       | 106                        |
| WTCCC2-UK          | 2,374                         | 5,175                     | 498                        | 460                       | 474                        |

Abbreviations: IS = ischemic stroke; LAS = large artery stroke; CE = cardioembolic; SVD = small vessel disease.
