# Supplementary material
Source: PubMed Central journal article supplement (PMC4451048)
Supplement: supp_WNL.0000000000001606_Table_e-3.pdf [file supp_WNL.0000000000001606_Table_e-3.pdf]

**Table e-3:** Overview of known risk loci for stroke in the migraine subtypes. Risk SNP refers to the top SNP found in the original publication, index SNP refers to the SNP with the lowest p-value in the region.

| <b>Risk Phenotype</b> | <b>Risk locus</b> | <b>Risk SNP</b> | <b>Risk p-value</b> | <b>Replication phenotype</b> | <b>p-value risk SNP</b> | <b>Index SNP</b> | <b>p-value index SNP</b> | <b>Distance bp</b> | <b>LD (r2)</b> |
|-----------------------|-------------------|-----------------|---------------------|------------------------------|-------------------------|------------------|--------------------------|--------------------|----------------|
| <b>LAS</b>            | <i>HDAC9</i>      | rs2107595       | 2.32E-12            | All Migraine                 | 0.16677                 | rs17351069       | 0.014559                 | 34,269             | 0.025          |
|                       |                   |                 |                     | MO                           | 0.6696                  | rs2526626        | 0.018591                 | 8,051              | 0.085          |
|                       |                   |                 |                     | MA                           | 0.2431                  | rs2717351        | 0.03338                  | 29,508             | 0.003          |
| <b>LAS</b>            | 6p21              | rs556621        | 9.84E-7             | All Migraine                 | 0.0557                  | rs9395036        | 0.003948                 | 13,875             | 0.373          |
|                       |                   |                 |                     | MO                           | 0.3037                  | rs499374         | 0.000462                 | 37,186             | 0              |
|                       |                   |                 |                     | MA                           | 0.8242                  | rs1283933        | 0.010992                 | 29,323             | 0.338          |
| <b>CE</b>             | <i>PITX2</i>      | rs6843082       | 1.14E-16            | All Migraine                 | 0.9694                  | rs3866838        | 0.011874                 | 35,748             | 0.001          |
|                       |                   |                 |                     | MO                           | 0.8265                  | rs3853444        | 0.157909                 | 16,069             | 0.058          |
|                       |                   |                 |                     | MA                           | 0.1910                  | rs7678327        | 0.008401                 | 36,268             | 0.001          |
| <b>CE</b>             | <i>ZFHX3</i>      | rs879324        | 7.18E-9             | All Migraine                 | 0.5034                  | rs4788694        | 0.013126                 | 1,405              | 0.262          |
|                       |                   |                 |                     | MO                           | 0.4764                  | rs11075958       | 0.081521                 | 34,809             | 0.005          |
|                       |                   |                 |                     | MA                           | 0.2180                  | rs8056528        | 0.002395                 | 32,045             | 0.058          |
| <b>LAS</b>            | 9p21              | rs1333047       | 1.64E-6             | All Migraine                 | 0.9477                  | rs10965267       | 0.021698                 | 37,324             | 0.009          |
|                       |                   |                 |                     | MO                           | 0.0032                  | rs10965224       | 4.00E-5                  | 57,228             | 0.398          |
|                       |                   |                 |                     | MA                           | 0.6211                  | rs10122243       | 0.016878                 | 34,420             | 0.009          |

Abbreviations: SNP = single nucleotide polymorphism; MO = migraine without aura; MA = migraine with aura; IS = ischemic stroke; LAS = large artery stroke; CE = cardioembolic; SVD = small vessel disease.
