# Supplementary material
Source: PubMed Central journal article supplement (PMC4451048)
Supplement: supp_WNL.0000000000001606_Table_e-4.pdf [file supp_WNL.0000000000001606_Table_e-4.pdf]

**Table e-4:** Overview of known migraine risk loci in ischemic stroke and subtypes. Risk SNP refers to the top SNP found in the original publication, index SNP refers to the SNP with the lowest p-value in the region.

| Risk Phenotype | Risk locus     | Risk SNP   | Risk p-value | Replication phenotype | p-value risk SNP | Index SNP (lowest p-value in region) | p-value index SNP | Distance bp | LD (r2) |
|----------------|----------------|------------|--------------|-----------------------|------------------|--------------------------------------|-------------------|-------------|---------|
| all Migraine   | <i>PRDM16</i>  | rs2651899  | 3.28E-14     | all IS                | 0.2848           | rs10909901                           | 0.01068           | 47,523      | 0.003   |
|                |                |            |              | LAS                   | 0.9852           | rs2817138                            | 0.05392           | 21,564      | 0.103   |
|                |                |            |              | CE                    | 0.5870           | rs12737500                           | 0.0216            | 10,996      | 0.103   |
|                |                |            |              | SVD                   | 0.0398           | rs10909901                           | 0.001368          | 47,523      | 0.003   |
| all Migraine   | <i>AJAP1</i>   | rs10915437 | 2.81E-8      | all IS                | 0.008851         | rs12065003                           | 0.003814          | 32,221      | 0       |
|                |                |            |              | LAS                   | 0.1056           | rs12042946                           | 0.03839           | 2,368       | 0.897   |
|                |                |            |              | CE                    | 0.08694          | rs12040805                           | 0.03219           | 2,164       | 1       |
|                |                |            |              | SVD                   | 0.1063           | rs4436359                            | 0.003531          | 42,976      | 0.033   |
| all Migraine   | <i>TSPAN2</i>  | rs12134493 | 6.71E-14     | all IS                | 0.9318           | rs1286233                            | 0.0785            | 22,817      | 0.010   |
|                |                |            |              | LAS                   | 0.8884           | rs1286233                            | 0.006153          | 22,817      | 0.010   |
|                |                |            |              | CE                    | 0.5931           | rs1573184                            | 0.005341          | 35,792      | 0.022   |
|                |                |            |              | SVD                   | 0.6326           | rs17033383                           | 0.09687           | 47,416      | 0.010   |
| all Migraine   | <i>MEF2D</i>   | rs2274316  | 3.14E-8      | all IS                | 0.2442           | rs10494305                           | 0.01699           | 46,182      | 0.008   |
|                |                |            |              | LAS                   | 0.5166           | rs947660                             | 0.1841            | 14,066      | 0.100   |
|                |                |            |              | CE                    | 0.5841           | rs10494305                           | 0.001459          | 46,182      | 0.008   |
|                |                |            |              | SVD                   | 0.01572          | rs10908505                           | 0.0131            | 22,001      | 0.965   |
| all Migraine   | <i>TRPM8</i>   | rs7577262  | 3.27E-13     | all IS                | 0.5504           | rs28900731                           | 0.1641            | 28,758      | 0       |
|                |                |            |              | LAS                   | 0.5618           | rs10929320                           | 0.1261            | 49,516      | 0.006   |
|                |                |            |              | CE                    | 0.7978           | rs10929320                           | 0.2375            | 49,516      | 0.006   |
|                |                |            |              | SVD                   | 0.2570           | rs577820                             | 0.08927           | 49,248      | 0.120   |
| all Migraine   | <i>TGFBR2</i>  | rs6790925  | 2.16E-8      | all IS                | 0.4760           | rs17567068                           | 0.02628           | 32,226      | 0.181   |
|                |                |            |              | LAS                   | 0.9731           | rs4447805                            | 0.02736           | 35,853      | 0.060   |
|                |                |            |              | CE                    | 0.6905           | rs12634852                           | 0.04704           | 46,205      | 0.168   |
|                |                |            |              | SVD                   | 0.1624           | rs9874162                            | 0.0347            | 31,287      | 0.483   |
| all Migraine   | <i>FHL5</i>    | rs13208321 | 2.15E-12     | all IS                | 0.0742           | rs9399973                            | 0.0007955         | 41,919      | 0.059   |
|                |                |            |              | LAS                   | 0.5007           | rs760620                             | 0.09161           | 1,452       | 0.008   |
|                |                |            |              | CE                    | 0.7835           | rs1116111                            | 0.001466          | 12,820      | 0.059   |
|                |                |            |              | SVD                   | 0.2932           | rs1116111                            | 0.0003423         | 12,820      | 0.059   |
| all Migraine   | <i>C7orf10</i> | rs4379368  | 1.46E-9      | all IS                | 0.8153           | rs13221876                           | 0.04143           | 49,644      | 0.031   |

|                     |                |            |          |        |         |            |          |        |       |
|---------------------|----------------|------------|----------|--------|---------|------------|----------|--------|-------|
|                     |                |            |          | LAS    | 0.3572  | rs6948150  | 0.0619   | 33,611 | 0     |
|                     |                |            |          | CE     | 0.3507  | rs2329772  | 0.008419 | 10,425 | 0.151 |
|                     |                |            |          | SVD    | 0.5612  | rs13221876 | 0.1832   | 49,644 | 0.031 |
| <b>all Migraine</b> | <i>ASTN2</i>   | rs6478241  | 1.04E-9  | all IS | 0.9867  | rs1321922  | 0.01377  | 10,220 | 0.148 |
|                     |                |            |          | LAS    | 0.9634  | rs12005639 | 0.03259  | 13,873 | 0.142 |
|                     |                |            |          | CE     | 0.6438  | rs12379134 | 0.007935 | 48,147 | 0.100 |
|                     |                |            |          | SVD    | 0.8765  | rs12002911 | 0.01201  | 16,332 | 0.220 |
| <b>all Migraine</b> | <i>LRP1</i>    | rs11172113 | 2.69E-19 | all IS | 0.4726  | rs715948   | 0.004473 | 5,699  | 0.212 |
|                     |                |            |          | LAS    | 0.01409 | -          | -        |        |       |
|                     |                |            |          | CE     | 0.6211  | rs17119494 | 0.01081  | 10,350 | 0.043 |
|                     |                |            |          | SVD    | 0.4119  | rs7306742  | 0.07543  | 6,596  | 0.057 |
| <b>MO</b>           | <i>PHACTR1</i> | rs9349379  | 2.81E-10 | all IS | 0.7628  | rs6914467  | 0.02513  | 39,648 | 0.007 |
|                     |                |            |          | LAS    | 0.8126  | rs7775710  | 0.01105  | 47,621 | 0.088 |
|                     |                |            |          | CE     | 0.9917  | rs9296494  | 0.06277  | 44,071 | 0.187 |
|                     |                |            |          | SVD    | 0.1286  | rs7750679  | 0.03384  | 12,656 | 0.357 |
| <b>MO</b>           | <i>MMP16</i>   | rs10504861 | 1.43E-8  | all IS | 0.4444  | rs12676132 | 0.1229   | 15,256 | 0.011 |
|                     |                |            |          | LAS    | 0.2238  | rs16884419 | 0.03069  | 31,717 | 0.672 |
|                     |                |            |          | CE     | 0.3274  | rs11998171 | 0.06524  | 49,157 | 0.559 |
|                     |                |            |          | SVD    | 0.4747  | rs1487960  | 0.1213   | 3,828  | 0.559 |
