# Supplementary material
Source: PubMed Central journal article supplement (PMC4451048)
Supplement: supp_WNL.0000000000001606_Table_e-5.pdf [file supp_WNL.0000000000001606_Table_e-5.pdf]

**Table e-5:** Overview of results of all polygenic risk scores. p-value is the p-value of the 1.d.f test of the risk score in the replication set. R<sup>2</sup> variance explained is the pseudo-variance explained by the risk score model in the replication dataset (x100 to display percentage). Odds Ratio is calculated from the estimated coefficient for regressing the response onto the risk score and is given as an increase of one standard deviation of the polygenic score.

| Discovery set | Replication set | p-value cutoff | N SNPs | p-value replication set | R2 variance explained (%) | Odds Ratio replication set [CI_95] |
|---------------|-----------------|----------------|--------|-------------------------|---------------------------|------------------------------------|
| All migraine  | All IS          | 0.5            | 88,479 | 0.3841789               | 0.001017949               | 1.003[0.996-1.009]                 |
|               |                 | 0.25           | 47,284 | 0.6084475               | 0.000352777               | 1.002[0.995-1.009]                 |
|               |                 | 0.1            | 20,914 | 0.4782398               | 0.000675968               | 1.003[0.994-1.012]                 |
|               |                 | 0.05           | 11,304 | 0.7843003               | 0.0001007114              | 0.999[0.988-1.009]                 |
|               |                 | 0.01           | 2,860  | 0.2693516               | 0.001639988               | 0.990 [0.974-1.008]                |
|               |                 | 0.001          | 469    | 0.6173425               | 0.0003355424              | 0.991[0.957-1.026]                 |
|               |                 | 0.0001         | 98     | 0.6999556               | 0.0001996397              | 0.988[0.927-1.052]                 |
| All IS        | All migraine    | 0.5            | 84,947 | 0.1304255               | 0.00192689                | 1.003[0.999-1.006]                 |
|               |                 | 0.25           | 42,800 | 0.1314767               | 0.001916401               | 1.003[0.999-1.007]                 |
|               |                 | 0.1            | 17,440 | 0.237828                | 0.001173797               | 1.003[0.998-1.008]                 |
|               |                 | 0.05           | 8,760  | 0.6690582               | 0.0001539092              | 1.001[0.995-1.008]                 |
|               |                 | 0.01           | 1,830  | 0.1065296               | 0.002194368               | 1.009 [0.998-1.020]                |
|               |                 | 0.001          | 206    | 0.9904244               | 1.21E-7                   | 1.000[0.973-1.027]                 |
|               |                 | 0.0001         | 33     | 0.1580889               | 0.001678372               | 0.959[0.906-1.016]                 |
| All migraine  | LAS             | 0.5            | 88,479 | 7.99E-9                 | 0.06481235                | 1.041[1.027-1.055]                 |
|               |                 | 0.25           | 47,284 | 4.02E-6                 | 0.04140625                | 1.036[1.021-1.052]                 |
|               |                 | 0.1            | 20,914 | 5.14E-5                 | 0.03194253                | 1.039[1.020-1.059]                 |
|               |                 | 0.05           | 11,304 | 0.005201902             | 0.01521116                | 1.033[1.010-1.056]                 |
|               |                 | 0.01           | 2,860  | 0.2363668               | 0.002731781               | 1.022[0.986-1.060]                 |
|               |                 | 0.001          | 469    | 0.2297882               | 0.002809788               | 0.956[0.888-1.029]                 |
|               |                 | 0.0001         | 98     | 0.05971362              | 0.006907217               | 0.878[0.766-1.005]                 |
| LAS           | All migraine    | 0.5            | 84,258 | 2.67E-9                 | 0.02982468                | 1.005[1.003-1.007]                 |
|               |                 | 0.25           | 42,421 | 4.65E-8                 | 0.0251482                 | 1.005[1.003-1.007]                 |
|               |                 | 0.1            | 17,511 | 0.001112002             | 0.008955139               | 1.004[1.002-1.006]                 |
|               |                 | 0.05           | 8,928  | 0.01201003              | 0.005314818               | 1.004[1.001-1.007]                 |
|               |                 | 0.01           | 1,875  | 0.02163194              | 0.004443629               | 1.006[1.001-1.011]                 |
|               |                 | 0.001          | 206    | 0.1805374               | 0.001510556               | 1.009[0.996-1.022]                 |
|               |                 | 0.0001         | 35     | 0.2561739               | 0.0010861                 | 0.985[0.959-1.011]                 |
| All migraine  | CE              | 0.5            | 88,479 | 1.46E-7                 | 0.04723656                | 1.035 [1.022-1.049]                |
|               |                 | 0.25           | 47,284 | 1.16E-6                 | 0.04039855                | 1.036[1.021-1.051]                 |

|              |              |        |        |              |              |                     |
|--------------|--------------|--------|--------|--------------|--------------|---------------------|
|              |              | 0.1    | 20,914 | 5.32E-5      | 0.02790681   | 1.037[1.019-1.055]  |
|              |              | 0.05   | 11,304 | 0.0004669003 | 0.02092495   | 1.039[1.017-1.061]  |
|              |              | 0.01   | 2,860  | 0.2829101    | 0.00197085   | 1.019[0.985-1.055]  |
|              |              | 0.001  | 469    | 0.508543     | 0.0007470512 | 1.024[0.955-1.097]  |
|              |              | 0.0001 | 98     | 0.3871199    | 0.001278463  | 1.057[0.932-1.200]  |
| CE           | All migraine | 0.5    | 82,187 | 5.94E-7      | 0.0209992    | 1.005[1.003-1.006]  |
|              |              | 0.25   | 41,403 | 1.32E-5      | 0.01598505   | 1.004[1.002-1.007]  |
|              |              | 0.1    | 16,805 | 0.0006068955 | 0.009901546  | 1.005[1.002-1.007]  |
|              |              | 0.05   | 8,415  | 0.04460998   | 0.00339757   | 1.003[.0001-1.007]  |
|              |              | 0.01   | 1,792  | 0.5189855    | 0.0003503565 | 1.002[0.996-1.008]  |
|              |              | 0.001  | 199    | 0.4821085    | 0.0004162151 | 1.005[0.991-1.019]  |
|              |              | 0.0001 | 10     | 0.8680288    | 2.32E-5      | 0.995[0.944-1.050]  |
| All migraine | SVD          | 0.5    | 88,479 | 0.08292964   | 0.005580929  | 1.013[0.998-1.028]  |
|              |              | 0.25   | 47,284 | 0.1423566    | 0.003995277  | 1.012[0.996-1.028]  |
|              |              | 0.1    | 20,914 | 0.2377455    | 0.002587515  | 1.012[0.992-1.032]  |
|              |              | 0.05   | 11,304 | 0.3318562    | 0.001747973  | 1.012[0.988-1.036]  |
|              |              | 0.01   | 2,860  | 0.03417505   | 0.00826969   | 1.043 [1.003-1.084] |
|              |              | 0.001  | 469    | 0.9626586    | 4.06884e-06  | 0.998[0.923-1.079]  |
|              |              | 0.0001 | 98     | 0.7334594    | 0.0002152567 | 0.976[0.846-1.125]  |
| SVD          | All migraine | 0.5    | 81,946 | 0.01639583   | 0.004859343  | 1.002[1.000-1.004]  |
|              |              | 0.25   | 41,273 | 0.001733565  | 0.008277913  | 1.003 [1.001-1.005] |
|              |              | 0.1    | 16,727 | 0.02476785   | 0.004252035  | 1.003[1.000-1.005]  |
|              |              | 0.05   | 8,448  | 0.04737419   | 0.00331729   | 1.003[1.000-1.006]  |
|              |              | 0.01   | 1,713  | 0.08510487   | 0.002501118  | 1.005[0.999-1.010]  |
|              |              | 0.001  | 174    | 0.8450377    | 3.22E-5      | 1.001[0.988-1.015]  |
|              |              | 0.0001 | 17     | 0.2358605    | 0.001185487  | 1.023[0.985-1.063]  |
| MO           | All IS       | 0.5    | 87,163 | 3.89E-10     | 0.05263249   | 1.011 [1.008-1.015] |
|              |              | 0.25   | 45,881 | 2.36E-8      | 0.04189677   | 1.011[1.007-1.015]  |
|              |              | 0.1    | 19,998 | 3.64E-7      | 0.0347758    | 1.012[1.008-1.017]  |
|              |              | 0.05   | 10,910 | 0.0001730153 | 0.01895639   | 1.011[1.005-1.017]  |
|              |              | 0.01   | 2,985  | 0.004199041  | 0.01101612   | 1.013[1.004-1.022]  |
|              |              | 0.001  | 700    | 0.2222792    | 0.002002313  | 1.009[0.994-1.025]  |
|              |              | 0.0001 | 220    | 0.511359     | 0.0005797374 | 0.992[0.970-1.016]  |
| All IS       | MO           | 0.5    | 84,947 | 6.02E-11     | 0.05592464   | 1.021 [1.015-1.028] |
|              |              | 0.25   | 42,800 | 2.99E-8      | 0.04012191   | 1.021[1.013-1.028]  |
|              |              | 0.1    | 17,440 | 1.84E-7      | 0.03552724   | 1.025[1.015-1.034]  |
|              |              | 0.05   | 8,760  | 9.88E-5      | 0.01980654   | 1.023[1.011-1.035]  |

|     |     |        |        |              |              |                     |
|-----|-----|--------|--------|--------------|--------------|---------------------|
|     |     | 0.01   | 1,830  | 0.03937858   | 0.005545696  | 1.022[1.001-1.043]  |
|     |     | 0.001  | 206    | 0.9699826    | 1.85E-6      | 0.999[0.951-1.049]  |
|     |     | 0.0001 | 33     | 0.3720217    | 0.001041232  | 0.953[0.858-1.059]  |
| MO  | LAS | 0.5    | 87,163 | 6.59E-24     | 0.1978478    | 1.039 [1.031-1.046] |
|     |     | 0.25   | 45,881 | 2.80E-18     | 0.1480092    | 1.037[1.029-1.046]  |
|     |     | 0.1    | 19,998 | 6.22E-11     | 0.0832538    | 1.034[1.024-1.045]  |
|     |     | 0.05   | 10,910 | 1.56E-6      | 0.04493048   | 1.030[1.018-1.043]  |
|     |     | 0.01   | 2,985  | 0.01344815   | 0.01190199   | 1.024[1.005-1.043]  |
|     |     | 0.001  | 700    | 0.8967881    | 3.282e-05    | 1.002[0.971-1.034]  |
|     |     | 0.0001 | 220    | 0.05719054   | 0.00704694   | 0.953[0.907-1.001]  |
| LAS | MO  | 0.5    | 84,258 | 6.43E-28     | 0.1566267    | 1.017[1.014-1.020]  |
|     |     | 0.25   | 42,421 | 2.13E-22     | 0.1237588    | 1.017[1.014-1.021]  |
|     |     | 0.1    | 17,511 | 2.14E-8      | 0.04097024   | 1.012[1.008-1.017]  |
|     |     | 0.05   | 8,928  | 3.54E-6      | 0.02808144   | 1.013[1.007-1.018]  |
|     |     | 0.01   | 1,875  | 0.003803252  | 0.01094283   | 1.014[1.005-1.024]  |
|     |     | 0.001  | 206    | 0.0039244    | 0.01086839   | 1.035[1.011-1.059]  |
|     |     | 0.0001 | 35     | 0.2091981    | 0.002060458  | 1.032[0.983-1.083]  |
| MO  | CE  | 0.5    | 87,163 | 9.10E-15     | 0.1026431    | 1.028 [1.021-1.035] |
|     |     | 0.25   | 45,881 | 1.10E-13     | 0.09427268   | 1.030[1.022-1.038]  |
|     |     | 0.1    | 19,998 | 2.16E-11     | 0.07656989   | 1.033[1.023-1.043]  |
|     |     | 0.05   | 10,910 | 3.38E-9      | 0.05972519   | 1.035[1.023-1.047]  |
|     |     | 0.01   | 2,985  | 8.31E-6      | 0.033946     | 1.041[1.023-1.060]  |
|     |     | 0.001  | 700    | 0.003041391  | 0.01501036   | 1.047[1.016-1.079]  |
|     |     | 0.0001 | 220    | 0.1130628    | 0.004291643  | 1.039[0.991-1.090]  |
| CE  | MO  | 0.5    | 82,187 | 2.74E-20     | 0.1112155    | 1.016 [1.012-1.019] |
|     |     | 0.25   | 41,403 | 4.70E-16     | 0.0860925    | 1.015[1.012-1.019]  |
|     |     | 0.1    | 16,805 | 3.51E-9      | 0.04556347   | 1.014[1.010-1.019]  |
|     |     | 0.05   | 8,415  | 0.0006718102 | 0.01511065   | 1.010[1.004-1.016]  |
|     |     | 0.01   | 1,792  | 0.03822927   | 0.005611456  | 1.011[1.001-1.022]  |
|     |     | 0.001  | 199    | 0.6342667    | 0.0002957101 | 1.006[0.981-1.033]  |
|     |     | 0.0001 | 10     | 0.7080022    | 0.0001832917 | 0.981[0.888-1.084]  |
| MO  | SVD | 0.5    | 87,163 | 0.00970438   | 0.01241499   | 1.010[1.003-1.018]  |
|     |     | 0.25   | 45,881 | 0.02516534   | 0.009304324  | 1.010[1.001-1.019]  |
|     |     | 0.1    | 19,998 | 0.004405539  | 0.01505106   | 1.016[1.005-1.027]  |
|     |     | 0.05   | 10,910 | 0.06460474   | 0.006339214  | 1.012[0.999-1.025]  |
|     |     | 0.01   | 2,985  | 0.01543763   | 0.01088826   | 1.025[1.005-1.045]  |
|     |     | 0.001  | 700    | 0.8261428    | 8.96E-5      | 1.004[0.971-1.038]  |

|        |        |        |        |              |              |                     |
|--------|--------|--------|--------|--------------|--------------|---------------------|
|        |        | 0.0001 | 220    | 0.584786     | 0.0005542234 | 0.986[0.936-1.038]  |
| SVD    | MO     | 0.5    | 81,946 | 0.001091     | 0.01393582   | 1.005[1.002-1.008]  |
|        |        | 0.25   | 41,273 | 1.47E-5      | 0.02453742   | 1.007[1.004-1.011]  |
|        |        | 0.1    | 16,727 | 2.97E-5      | 0.02277685   | 1.009[1.005-1.013]  |
|        |        | 0.05   | 8,448  | 0.0004593984 | 0.01603558   | 1.010[1.004-1.015]  |
|        |        | 0.01   | 1,713  | 0.08519736   | 0.003871218  | 1.009 [1.000-1.018] |
|        |        | 0.001  | 174    | 0.9363779    | 8.32E-6      | 0.999 [0.974-1.024] |
|        |        | 0.0001 | 17     | 0.4992728    | 0.0005964414 | 1.024 [0.955-1.099] |
| MA     | all IS | 0.5    | 87,674 | 0.001919924  | 0.01293662   | 0.995[0.992-0.998]  |
|        |        | 0.25   | 45,917 | 0.001700301  | 0.01323673   | 0.994[0.991-0.998]  |
|        |        | 0.1    | 19,947 | 0.008005844  | 0.009452279  | 0.994[0.990-0.998]  |
|        |        | 0.05   | 10,514 | 0.04670546   | 0.00531752   | 0.995[0.989-1.000]  |
|        |        | 0.01   | 2,558  | 0.1647813    | 0.002594015  | 0.994[0.985-1.003]  |
|        |        | 0.001  | 359    | 0.9561469    | 4.06E-6      | 0.999[0.980-1.019]  |
|        |        | 0.0001 | 62     | 0.7692635    | 0.0001156659 | 0.994[0.956-1.034]  |
| All IS | MA     | 0.5    | 84,947 | 0.002271824  | 0.01173845   | 0.989[0.982-0.996]  |
|        |        | 0.25   | 42,800 | 0.01411022   | 0.007591104  | 0.990[0.982-0.998]  |
|        |        | 0.1    | 17,440 | 0.1036981    | 0.00333642   | 0.991[0.981-1.002]  |
|        |        | 0.05   | 8,760  | 0.09833478   | 0.003443046  | 0.989[0.977-1.002]  |
|        |        | 0.01   | 1,830  | 0.770547     | 0.0001071931 | 0.997[0.974-1.020]  |
|        |        | 0.001  | 206    | 0.5859771    | 0.0003738426 | 1.016[0.961-1.074]  |
|        |        | 0.0001 | 33     | 0.6432009    | 0.0002703983 | 1.029[0.913-1.158]  |
| MA     | LAS    | 0.5    | 87,674 | 0.002842184  | 0.01735053   | 1.010[1.003-1.017]  |
|        |        | 0.25   | 45,917 | 0.0005424691 | 0.02330653   | 1.013[1.006-1.020]  |
|        |        | 0.1    | 19,947 | 0.008290151  | 0.01357835   | 1.012[1.003-1.022]  |
|        |        | 0.05   | 10,514 | 0.01899791   | 0.01071857   | 1.013[1.002-1.025]  |
|        |        | 0.01   | 2,558  | 0.6127932    | 0.0004990196 | 1.005[0.986-1.024]  |
|        |        | 0.001  | 359    | 0.1401621    | 0.004239825  | 1.031[0.990-1.074]  |
|        |        | 0.0001 | 62     | 0.7617135    | 0.0001791474 | 1.013[0.932-1.102]  |
| LAS    | MA     | 0.5    | 84,258 | 0.00489229   | 0.009978244  | 1.005[1.001-1.008]  |
|        |        | 0.25   | 42,421 | 0.00562345   | 0.009661154  | 1.005[1.002-1.009]  |
|        |        | 0.1    | 17,511 | 0.02730792   | 0.006138195  | 1.006[1.001-1.010]  |
|        |        | 0.05   | 8,928  | 0.08855574   | 0.003654851  | 1.005[0.999-1.011]  |
|        |        | 0.01   | 1,875  | 0.7254421    | 0.0001554215 | 1.002[0.991-1.013]  |
|        |        | 0.001  | 206    | 0.2178814    | 0.001913197  | 0.984[0.958-1.010]  |
|        |        | 0.0001 | 35     | 0.03629165   | 0.005523428  | 0.943[0.893-0.996]  |
| MA     | CE     | 0.5    | 87,674 | 0.4001004    | 0.001210188  | 1.003[0.996-1.009]  |

|     |     |        |        |            |              |                     |
|-----|-----|--------|--------|------------|--------------|---------------------|
|     |     | 0.25   | 45,917 | 0.4639738  | 0.0009166549 | 0.997[0.990-1.004]  |
|     |     | 0.1    | 19,947 | 0.5447537  | 0.000626953  | 0.997[0.989-1.006]  |
|     |     | 0.05   | 10,514 | 0.8412393  | 6.85E-5      | 1.001[0.991-1.012]  |
|     |     | 0.01   | 2,558  | 0.2316894  | 0.0001430357 | 0.989 [0.972-1.007] |
|     |     | 0.001  | 359    | 0.4558175  | 0.0009505903 | 0.985[0.947-1.025]  |
|     |     | 0.0001 | 62     | 0.960248   | 4.24E-6      | 1.002[0.925-1.086]  |
| CE  | MA  | 0.5    | 82,187 | 0.9249247  | 1.12E-5      | 1.000[0.996-1.004]  |
|     |     | 0.25   | 41,403 | 0.6002806  | 0.0003459965 | 1.001[0.997-1.005]  |
|     |     | 0.1    | 16,805 | 0.1643294  | 0.002436967  | 1.004[0.998-1.009]  |
|     |     | 0.05   | 8,415  | 0.1218701  | 0.003015594  | 1.005[0.999-1.012]  |
|     |     | 0.01   | 1,792  | 0.5998954  | 0.0003467283 | 1.003[0.991-1.015]  |
|     |     | 0.001  | 199    | 0.7573933  | 0.0001202448 | 1.005[0.976-1.034]  |
|     |     | 0.0001 | 10     | 0.03535249 | 0.005579779  | 1.126[1.008-1.257]  |
| MA  | SVD | 0.5    | 87,674 | 0.3431865  | 0.001667875  | 1.003[0.996-1.010]  |
|     |     | 0.25   | 45,917 | 0.5164051  | 0.0007816323 | 1.003[0.995-1.010]  |
|     |     | 0.1    | 19,947 | 0.8715384  | 4.85E-5      | 0.999[0.990-1.009]  |
|     |     | 0.05   | 10,514 | 0.4187141  | 0.001213881  | 0.995[0.983-1.007]  |
|     |     | 0.01   | 2,558  | 0.9324549  | 1.33E-5      | 0.999[0.980-1.019]  |
|     |     | 0.001  | 359    | 0.6310737  | 0.0004280807 | 1.011[0.968-1.056]  |
|     |     | 0.0001 | 62     | 0.7082374  | 0.0002599661 | 1.017[0.931-1.112]  |
| SVD | MA  | 0.5    | 81,946 | 0.1736529  | 0.002332624  | 1.002[0.999-1.006]  |
|     |     | 0.25   | 41,273 | 0.07356551 | 0.004034367  | 1.003[0.999-1.007]  |
|     |     | 0.1    | 16,727 | 0.3215739  | 0.001238112  | 1.002[0.998-1.007]  |
|     |     | 0.05   | 8,448  | 0.6546484  | 0.0002521385 | 1.001[0.995-1.007]  |
|     |     | 0.01   | 1,713  | 0.3579028  | 0.001065103  | 1.005[0.994-1.016]  |
|     |     | 0.001  | 174    | 0.2570822  | 0.001618498  | 1.016[0.988-1.045]  |
|     |     | 0.0001 | 17     | 0.5022027  | 0.0005674071 | 1.028[0.949-1.113]  |

Abbreviations: MO = migraine without aura; MA = migraine with aura; IS = ischemic stroke; LAS = large artery stroke; CE = cardioembolic; SVD = small vessel disease.
