# Supplementary material
Source: PubMed Central journal article supplement (PMC4451048)
Supplement: supp_WNL.0000000000001606_Table_e-6.pdf [file supp_WNL.0000000000001606_Table_e-6.pdf]

**Table e-6:** Cross Phenotype Spatial Mapping (CPSM) results for All reported loci with peak height > 1.5 for ischemic stroke and migraine subtype where the calculation was performed. Chromosomal band, chromosomal location, peak SNP and peak height are displayed. Direction of effect is given for the peak SNP. Genes in the region denote All genes found within the specified region. Results with a peak height > 2.5 are given in Table 2.

| <b>Migraine Phenotype</b> | <b>Stroke Phenotype</b> | <b>Chr band</b> | <b>Position (Mb)</b> | <b>Locus size</b> | <b>Peak SNP</b> | <b>Same directional effect</b> | <b>Peak height</b> | <b>Genes within locus</b>                             |
|---------------------------|-------------------------|-----------------|----------------------|-------------------|-----------------|--------------------------------|--------------------|-------------------------------------------------------|
| All migraine              | All IS                  | 1p32.3          | 53.8-53.9            | 96.5kB            | rs12045240      | N                              | 1.97               | <i>GLIS1</i>                                          |
| All migraine              | All IS                  | 1q21.2          | 146.3-148.1          | 1.80MB            | rs7531664       | N                              | 2.37               | <i>NBPF1, NBPF12, PPIAL4A, NBPF20, NBPF15, NBPF16</i> |
| All migraine              | All IS                  | 5q33.1          | 151.0-151.1          | 57.5kB            | rs2915827       | N                              | 1.75               | <i>ATOX1, G3BP1</i>                                   |
| All migraine              | All IS                  | 7q21.11         | 77.9-78.0            | 56.3kB            | rs6466258       | Y                              | 1.50               | <i>MAGI2</i>                                          |
| All migraine              | All IS                  | 8q12.1          | 60.3-60.5            | 78.0kB            | rs4386970       | Y                              | 1.61               | -                                                     |
| All migraine              | All IS                  | 8q24.3          | 143.3-144.4          | 97.3kB            | rs7465202       | Y                              | 1.78               | <i>TSNARE1</i>                                        |
| All migraine              | All IS                  | 10q26.13        | 123.3-123.4          | 111.7kB           | rs2981579       | N                              | 2.07               | <i>FGFR2</i>                                          |
| All migraine              | All IS                  | 11p15.4         | 10.6-10.7            | 86.2kB            | rs7940646       | Y                              | 2.03               | <i>MRVII</i>                                          |
| All migraine              | All IS                  | 11q13.5         | 76.6-76.7            | 112.1kB           | rs1793488       | Y                              | 1.72               | <i>GDPD4, PAK1</i>                                    |
| All migraine              | All IS                  | 12q13.11        | 48.3-48.4            | 168.6kB           | rs4641552       | Y                              | 1.73               | <i>FAM186B, PRPF40B, FMNL3, TMBIM6</i>                |
| All migraine              | All IS                  | 13q22.3         | 78.1-78.3            | 101.8kB           | rs9574277       | Y                              | 2.09               | -                                                     |
| All migraine              | All IS                  | 13q32.2         | 98.9-99.2            | 190.7kB           | rs1570738       | N                              | 1.91               | <i>TM9SF2, CLYBL</i>                                  |
| All migraine              | All IS                  | 16p11.2         | 29.8-29.9            | 88.7kB            | rs4609871       | Y                              | 1.72               | <i>IMAA, SEZ6L2, ASPHD1, KCTD13, TMEM219</i>          |
| All migraine              | All IS                  | 16p11.2         | 30.0-30.3            | 219.5kB           | rs7202714       | Y                              | 1.62               | <i>IMAA, GIYD2, CORO1A, SULT1A3, BOLA2B</i>           |

|              |        |          |             |         |            |   |      |                                                      |
|--------------|--------|----------|-------------|---------|------------|---|------|------------------------------------------------------|
| All migraine | All IS | 17p13.1  | 7.3-7.4     | 77.5kB  | rs9890920  | N | 1.70 | <i>ZBTB4, POLR2A</i>                                 |
| All migraine | LAS    | 3p21.31  | 48.4-48.5   | 79.9kB  | rs6442120  | Y | 1.59 | <i>FBXW12, PLXNB1, CCDC51, ATRIP, TREX1</i>          |
| All migraine | LAS    | 3q27.3   | 189.0-189.1 | 66.0kB  | rs577790   | N | 1.79 | -                                                    |
| All migraine | LAS    | 5p14.1   | 29.0-29.1   | 81.1kB  | rs1692347  | Y | 1.64 | -                                                    |
| All migraine | LAS    | 5q12.3   | 65.4-65.6   | 106.8kB | rs36838    | Y | 1.67 | <i>SFRS12</i>                                        |
| All migraine | LAS    | 5q14.1   | 77.3-77.4   | 91.8kB  | rs252795   | N | 1.93 | <i>AP3B1</i>                                         |
| All migraine | LAS    | 5q15     | 92.9-93.0   | 86.0kB  | rs1046217  | N | 1.60 | <i>NR2F1, FAM172A</i>                                |
| All migraine | LAS    | 5q15     | 93.4-93.5   | 114.8kB | rs9314099  | N | 1.56 | <i>FAM172A</i>                                       |
| All migraine | LAS    | 8q21.13  | 84.2-84.3   | 62.9kB  | rs4481591  | Y | 1.69 | -                                                    |
| All migraine | LAS    | 10q22.3  | 78.92-79.03 | 118.3kB | rs816855   | Y | 1.66 | <i>KCNMA1</i>                                        |
| All migraine | LAS    | 12q13.3  | 55.8-55.9   | 86.1kB  | rs1385526  | Y | 2.24 | <i>STAT6, LRP1</i>                                   |
| All migraine | LAS    | 12q24.12 | 110.5-110.9 | 381.5kB | rs7962138  | N | 2.20 | <i>ATXN2, BRAP, ACAD10, ALDH2, MAPKAPK5, TMEM116</i> |
| All migraine | LAS    | 14q13.2  | 35.1-35.2   | 134.6kB | rs10133920 | N | 1.51 | <i>GARNLI</i>                                        |
| All migraine | LAS    | 14q13.2  | 35.2-35.4   | 140.5kB | rs4982310  | Y | 1.86 | <i>GARNLI, BRMS1L</i>                                |
| All migraine | LAS    | 15q11.2  | 21.3-21.4   | 72.6kB  | rs6576538  | Y | 1.87 | <i>MKRN3</i>                                         |
| All migraine | LAS    | 15q24.1  | 71.5-71.6   | 83.9kB  | rs8039395  | N | 1.73 | <i>C15orf60</i>                                      |
| All migraine | LAS    | 16q23.1  | 73.8-74.0   | 207.6kB | rs7203157  | Y | 2.21 | <i>CFDP1, TMEM170A</i>                               |

|              |     |          |             |         |            |   |      |                                                                     |
|--------------|-----|----------|-------------|---------|------------|---|------|---------------------------------------------------------------------|
| All migraine | LAS | 19p13.11 | 19.3-19.5   | 233.9kB | rs11669730 | N | 1.84 | <i>GATAD2A, TSSK6, YJEFN3, CIPL2, PBX4</i>                          |
| All migraine | CE  | 1q21.2   | 148.5-148.8 | 293.1kB | rs3754214  | N | 2.19 | <i>C1orf51, C1orf54, MRPS21, PPR3, RPRD2, TARS2, ECM1, ADAMTSL4</i> |
| All migraine | CE  | 2p12     | 83.3-83.4   | 64.9kB  | rs6547485  | Y | 1.63 | -                                                                   |
| All migraine | CE  | 2q13     | 112.5-112.6 | 77.4kB  | rs9653422  | Y | 1.92 | <i>TMEM87B, FBLN7</i>                                               |
| All migraine | CE  | 2q13     | 112.7-112.9 | 213.3kB | rs6751146  | Y | 1.53 | <i>ZC3H8, ZC3H6, RGPD5</i>                                          |
| All migraine | CE  | 4q25     | 111.7-111.8 | 55.6kB  | rs2197815  | Y | 1.93 | <i>PITX2</i>                                                        |
| All migraine | CE  | 5q35.1   | 170.2-170.5 | 271.3kB | rs930890   | Y | 1.93 | <i>RANBP17</i>                                                      |
| All migraine | CE  | 6q14.1   | 76.1-76.3   | 183.1kB | rs2998393  | Y | 1.89 | <i>FILIP1</i>                                                       |
| All migraine | CE  | 6q25.2   | 154.8-154.9 | 68.8kB  | rs6557352  | N | 1.80 | <i>CNKSR3</i>                                                       |
| All migraine | CE  | 8q13.1   | 67.7-67.8   | 73.6kB  | rs6983214  | Y | 1.64 | <i>VCPIP1, SGK3</i>                                                 |
| All migraine | CE  | 9q21.32  | 85.7-85.8   | 110.6kB | rs7853377  | N | 1.65 | <i>KIF27, C9orf64, HNRPK, RMI1</i>                                  |
| All migraine | CE  | 10q21.1  | 57.3-57.5   | 87.4kB  | rs10733942 | Y | 1.82 | -                                                                   |
| All migraine | CE  | 10q22.1  | 74.0-74.3   | 280.5kB | rs12779026 | Y | 1.83 | <i>CBARA1, CCDC109A</i>                                             |
| All migraine | CE  | 11p11.2  | 46.4-46.6   | 222.9kB | rs2171667  | N | 1.66 | <i>DGKZ, MDK, AMBRA1</i>                                            |
| All migraine | CE  | 13q14.3  | 49.4-49.5   | 135.1kB | rs2407882  | N | 1.86 | <i>C13orf1, DLEU2, TRIM13, KCNRG</i>                                |
| All migraine | CE  | 17q25.3  | 75.0-75.3   | 308.1kB | rs12603858 | Y | 1.72 | <i>HRNBP3</i>                                                       |
| All migraine | CE  | 21q21.2  | 23.0-23.1   | 81.5kB  | rs2827688  | N | 2.15 | -                                                                   |

|                     |     |          |             |         |            |   |      |                              |
|---------------------|-----|----------|-------------|---------|------------|---|------|------------------------------|
| <b>All migraine</b> |     |          |             |         |            |   |      |                              |
| <b>All migraine</b> | SVD | 1p36.32  | 3.0-3.1     | 58.7kB  | rs2651899  | N | 1.51 | <i>PRDM16</i>                |
| <b>All migraine</b> | SVD | 1p21.3   | 98.1-98.2   | 88.4kB  | rs1801265  | Y | 1.91 | <i>DPYD</i>                  |
| <b>All migraine</b> | SVD | 2q31.1   | 174.6-174.8 | 203.5kB | rs12463405 | Y | 2.39 | <i>OLA1</i>                  |
| <b>All migraine</b> | SVD | 2q32.1   | 186.4-186.5 | 139.1kB | rs12478116 | Y | 1.61 | -                            |
| <b>All migraine</b> | SVD | 2q33.1   | 203.4-203.5 | 97.6kB  | rs7582720  | Y | 2.07 | <i>ICAIL, WDR12, ALS2CR8</i> |
| <b>All migraine</b> | SVD | 3p21.31  | 44.9-45.0   | 91.6kB  | rs4683012  | Y | 1.88 | <i>TGM4, ZDHHC3, EXOSC7</i>  |
| <b>All migraine</b> | SVD | 4p15.1   | 35.2-35.3   | 99.7kB  | rs7678149  | Y | 1.86 | -                            |
| <b>All migraine</b> | SVD | 5q31.1   | 132.4-132.5 | 69.6kB  | rs4321746  | Y | 2.18 | <i>HSPA4</i>                 |
| <b>All migraine</b> | SVD | 5q32     | 145.8-145.9 | 68.0kB  | rs7719203  | Y | 1.82 | <i>TCERG1</i>                |
| <b>All migraine</b> | SVD | 5q35.1   | 170.2-170.5 | 277.6kB | rs811407   | Y | 2.06 | <i>RANBP17</i>               |
| <b>All migraine</b> | SVD | 6p24.1   | 13.0-13.1   | 68.0kB  | rs7454157  | Y | 1.66 | <i>PHACTR1</i>               |
| <b>All migraine</b> | SVD | 6q16.1   | 97.0-97.2   | 194.5kB | rs11153058 | N | 1.73 | <i>FHL5, KIAA0776</i>        |
| <b>All migraine</b> | SVD | 8q24.21  | 130.9-131.0 | 88.6kB  | rs2046260  | Y | 2.23 | <i>FAM49B</i>                |
| <b>All migraine</b> | SVD | 9p13.2   | 36.9-37.0   | 55.5kB  | rs10814501 | Y | 1.64 | <i>PAX5</i>                  |
| <b>All migraine</b> | SVD | 9q33.1   | 118.3-118.4 | 102.0kB | rs4836756  | N | 2.44 | <i>ASTN2</i>                 |
| <b>All migraine</b> | SVD | 12q14.1  | 57.3-57.4   | 66.5kB  | rs12300285 | N | 1.71 | -                            |
| <b>All migraine</b> | SVD | 13q14.11 | 43.3-43.4   | 74.9kB  | rs2275252  | N | 1.56 | <i>CCDC122, C13orf31</i>     |

|                     |        |          |             |         |            |   |      |                                            |
|---------------------|--------|----------|-------------|---------|------------|---|------|--------------------------------------------|
| <b>All migraine</b> | SVD    | 14q24.1  | 67.4-67.7   | 274.2kB | rs11158716 | N | 2.19 | <i>RAD51L1</i>                             |
| <b>All migraine</b> | SVD    | 16p13.11 | 15.4-15.5   | 80.0kB  | rs1684546  | N | 1.78 | <i>C16orf45</i>                            |
| <b>All migraine</b> | SVD    | 17q21.13 | 38.9-39.0   | 96.6kB  | rs2271958  | Y | 1.57 | <i>DHX8, ETV4</i>                          |
| <b>All migraine</b> | SVD    | 21q21.2  | 22.9-23.0   | 76.3kB  | rs7280779  | Y | 1.64 | -                                          |
| <b>MO</b>           | All IS | 1p32.3   | 53.8-53.9   | 82.2kB  | rs1474462  | N | 1.53 | <i>GLIS1</i>                               |
| <b>MO</b>           | All IS | 4q31.2   | 144.2-144.5 | 321.0kB | rs7680365  | Y | 2.15 | <i>USP38, GAB1</i>                         |
| <b>MO</b>           | All IS | 5p15.1   | 17.6-17.8   | 192.7kB | rs6450583  | Y | 1.91 | -                                          |
| <b>MO</b>           | All IS | 5q31.2   | 138.3-138.5 | 112.7kB | rs10054478 | Y | 1.87 | <i>SIL1</i>                                |
| <b>MO</b>           | All IS | 9p21.3   | 22.0-22.1   | 119.9kB | rs1537370  | Y | 1.85 | <i>MTAP, CDKN2BAS</i>                      |
| <b>MO</b>           | All IS | 9q32     | 114.0-114.1 | 113.7kB | rs4369055  | N | 1.68 | <i>ROD1</i>                                |
| <b>MO</b>           | All IS | 10q22.1  | 72.6-72.7   | 66.9kB  | rs10999736 | N | 1.58 | <i>UNC5B</i>                               |
| <b>MO</b>           | All IS | 10q23.33 | 94.6-94.7   | 95.1kB  | rs10882121 | Y | 1.56 | <i>EXOC6</i>                               |
| <b>MO</b>           | All IS | 13q14.3  | 49.6-49.7   | 69.1kB  | rs2066612  | Y | 1.55 | <i>XTP6</i>                                |
| <b>MO</b>           | All IS | 21q21.1  | 15.4-15.5   | 92.3kB  | rs2896689  | Y | 2.12 | -                                          |
| <b>MO</b>           | LAS    | 4q24     | 105.4-105.6 | 109.0kB | rs6853209  | Y | 2.14 | -                                          |
| <b>MO</b>           | LAS    | 5p14.1   | 29.0-29.1   | 92.7kB  | rs1692345  | Y | 1.73 | -                                          |
| <b>MO</b>           | LAS    | 6p24.1   | 13.0-13.2   | 200.6kB | rs7739181  | Y | 1.68 | <i>PHACTR1</i>                             |
| <b>MO</b>           | LAS    | 7q31.32  | 123.1-123.2 | 120.4kB | rs7776792  | N | 1.60 | <i>ASB15, LMOD2, WASL</i>                  |
| <b>MO</b>           | LAS    | 8p12     | 35.2-35.3   | 117.0kB | rs2980401  | N | 2.39 | <i>UNC5D</i>                               |
| <b>MO</b>           | LAS    | 12q24.11 | 109.9-110.0 | 98.8kB  | rs4378452  | N | 2.09 | <i>CUX2</i>                                |
| <b>MO</b>           | LAS    | 19p13.3  | 2.1-2.2     | 110.6kB | rs7248941  | N | 2.17 | <i>AP3D1, DOT1L,</i>                       |
| <b>MO</b>           | LAS    | 19p13.11 | 19.3-19.6   | 277.1kB | rs11669730 | Y | 1.77 | <i>GATAD2A, TSSK6, YJEFN3, CIPL2, PBX4</i> |
| <b>MO</b>           | CE     | 1q21.2   | 148.7-148.8 | 107.3kB | rs3754214  | N | 1.62 | <i>RPRD2, TARS2, ECM1</i>                  |
| <b>MO</b>           | CE     | 1q31.1   | 187.2-187.3 | 102.7kB | rs1373936  | Y | 1.80 | -                                          |
| <b>MO</b>           | CE     | 2p15     | 61.5-61.7   | 144.1kB | rs7421663  | N | 1.65 | <i>USP34, XPO1</i>                         |
| <b>MO</b>           | CE     | 2q22.3   | 146.8-147.0 | 154.8kB | rs12691739 | Y | 1.84 | -                                          |
| <b>MO</b>           | CE     | 3p12.3   | 80.4-80.6   | 193.8kB | rs10154970 | Y | 1.79 | -                                          |
| <b>MO</b>           | CE     | 5p14.3   | 19.6-19.8   | 140.0kB | rs13177990 | N | 2.23 | <i>CDH18</i>                               |
| <b>MO</b>           | CE     | 5q31.2   | 138.3-138.5 | 173.8kB | rs10054478 | Y | 2.04 | <i>SIL1</i>                                |

|    |        |          |             |         |            |   |      |                                |
|----|--------|----------|-------------|---------|------------|---|------|--------------------------------|
| MO | CE     | 10q22.1  | 74.0-74.3   | 275.2kB | rs6480640  | Y | 1.87 | <i>CBARA1, CCDC109A</i>        |
| MO | CE     | 10q24.2  | 100.7-100.8 | 116.3kB | rs10466169 | Y | 1.77 | <i>HPSE2</i>                   |
| MO | CE     | 17p11    | 22.2-22.3   | 190.5kB | rs7213203  | N | 2.30 | -                              |
| MO | CE     | 17p11.2  | 22.4-22.5   | 152.7kB | rs2061900  | Y | 1.77 | -                              |
| MO | SVD    | 2p25.1   | 8.9-9.1     | 147.0kB | rs7608273  | Y | 2.04 | <i>MBOAT2</i>                  |
| MO | SVD    | 3p21.31  | 44.9-45.0   | 87.7kB  | rs9877753  | Y | 1.86 | <i>TGM4, ZDHHC3, EXOSC7</i>    |
| MO | SVD    | 3p14.3   | 57.2-57.3   | 101.0kB | rs4640525  | N | 1.86 | <i>HESX1, APPL1, ASB14</i>     |
| MO | SVD    | 5p15.32  | 5.3-5.4     | 59.1kB  | rs7723605  | N | 1.69 | -                              |
| MO | SVD    | 6p24.1   | 12.9-13.1   | 85.9kB  | rs2327620  | Y | 2.46 | <i>PHACTR1</i>                 |
| MO | SVD    | 6q16.1   | 97.0-97.2   | 215.2kB | rs11153058 | N | 2.30 | <i>KIAA0776, FHL5</i>          |
| MO | SVD    | 8p12     | 33.1-33.3   | 105.0kB | rs6468145  | N | 1.56 | -                              |
| MO | SVD    | 9q33.1   | 118.3-118.4 | 77.9kB  | rs10116835 | N | 1.65 | <i>ASTN2</i>                   |
| MO | SVD    | 12q14.1  | 57.3-57.4   | 69.8kB  | rs12300285 | Y | 2.03 | -                              |
| MO | SVD    | 22q11.22 | 21.1-21.2   | 76.3kB  | rs5758522  | N | 1.63 | <i>ZNF280B, ZNF280A, PRAME</i> |
| MA | All IS | 4q26     | 119.0-119.1 | 112.7kB | rs6834344  | Y | 1.82 | -                              |
| MA | All IS | 5q23.3   | 127.9-128.0 | 82.1kB  | rs4362987  | Y | 1.67 | -                              |
| MA | All IS | 6p23     | 14.5-14.6   | 71.6kB  | rs9476573  | N | 2.13 | -                              |
| MA | All IS | 9q32     | 114.0-114.1 | 102.7kB | rs943620   | Y | 1.62 | <i>ROD1</i>                    |
| MA | All IS | 10q26.13 | 123.3-123.4 | 97.2kB  | rs1219648  | N | 1.68 | <i>FGFR2</i>                   |
| MA | All IS | 11q13.5  | 76.6-76.9   | 253.5kB | rs2725810  | Y | 2.08 | <i>GDPD4, PAK1</i>             |
| MA | All IS | 11q23.1  | 111.7-111.8 | 81.7kB  | rs10789877 | N | 1.67 | -                              |
| MA | All IS | 15q22.2  | 57.7-57.8   | 113.5kB | rs7182962  | Y | 1.68 | <i>GCNT3, GTF2A2, BNIP2</i>    |
| MA | All IS | 19p13.2  | 11.0-11.1   | 66.4kB  | rs8099996  | N | 1.99 | <i>SMARCA4, LDLR</i>           |
| MA | LAS    | 2q21.3   | 135.3-135.4 | 123.4kB | rs1446525  | Y | 1.90 | <i>ACMSD, CCNT2</i>            |
| MA | LAS    | 4q28.1   | 128.3-128.5 | 188.5kB | rs1596282  | Y | 1.65 | -                              |
| MA | LAS    | 5p13.3   | 34.0-34.1   | 86.0kB  | rs253202   | N | 1.55 | <i>SLC45A2, AMACR, C1QTNF3</i> |
| MA | LAS    | 7q31.1   | 113.7-113.8 | 109.7kB | rs1728438  | N | 2.41 | <i>FOXP2</i>                   |
| MA | LAS    | 8q24.12  | 120.5-120.6 | 71.5kB  | rs7000665  | N | 1.54 | -                              |
| MA | LAS    | 10q22.2  | 75.4-75.5   | 91.9kB  | rs11594818 | Y | 2.06 | <i>VCL</i>                     |
| MA | LAS    | 10q25.3  | 117.9-118.1 | 155.1kB | rs2577383  | Y | 1.60 | <i>GFRA1, C10orf95</i>         |
| MA | LAS    | 11q22.3  | 103.7-103.8 | 116.0kB | rs4755023  | N | 1.63 | -                              |
| MA | LAS    | 15q24.1  | 70.4-70.5   | 106.4kB | rs4556749  | Y | 1.86 | <i>BRUNOL6, HEXA, TMEM202</i>  |
| MA | LAS    | 17q23.2  | 57.2-57.3   | 88.1kB  | rs1015771  | Y | 1.66 | <i>BRIP1</i>                   |

|    |     |         |             |         |            |   |      |                                      |
|----|-----|---------|-------------|---------|------------|---|------|--------------------------------------|
| MA | CE  | 4p16.3  | 0.24-0.34   | 104.2kB | rs6828802  | N | 2.36 | <i>ZNF141</i>                        |
| MA | CE  | 4q26    | 119.0-119.1 | 89.0kB  | rs11098412 | Y | 1.65 | -                                    |
| MA | CE  | 6p22.1  | 29.7-29.8   | 67.7kB  | rs3025632  | N | 2.05 | <i>GABBR1</i>                        |
| MA | CE  | 10q21.1 | 57.4-57.5   | 68.7kB  | rs11005196 | N | 1.58 | -                                    |
| MA | CE  | 11p11.2 | 56.4-56.6   | 241.0kB | rs2864076  | N | 1.74 | <i>MDK, CHRM4, AMBRA1, HARB11</i>    |
| MA | CE  | 14q13.2 | 35.3-35.4   | 114.8kB | rs4981309  | N | 2.12 | <i>GARNL1, BRMS1L</i>                |
| MA | CE  | 15q15.1 | 40.5-40.7   | 137.2kB | rs8033412  | Y | 1.94 | <i>SNAP23, LRRC57, CEP27</i>         |
| MA | CE  | 15q25.3 | 86.5-86.6   | 84.7kB  | rs11635443 | N | 2.17 | <i>NTRK3</i>                         |
| MA | CE  | 17p13.1 | 7.3-7.4     | 96.6kB  | rs4796430  | N | 2.39 | <i>CHRNB1, ZBTB4, AMA1L3, POLR2A</i> |
| MA | CE  | 17q23.2 | 58.2-58.3   | 86.7kB  | rs1476811  | N | 2.01 | <i>MARCH10</i>                       |
| MA | CE  | 20q13.2 | 50.5-50.6   | 83.0kB  | rs6021974  | Y | 2.10 | -                                    |
| MA | SVD | 2q31.1  | 174.7-174.8 | 105.8kB | rs12463405 | Y | 1.77 | <i>OLA1</i>                          |
| MA | SVD | 3p21.3  | 49.6-49.7   | 92.7kB  | rs2131109  | N | 2.04 | <i>BSN, APEH, MST1, RNF123</i>       |
| MA | SVD | 3q11.2  | 99.0-99.2   | 183.4kB | rs831882   | N | 1.61 | <i>ARL6, CRYBG3, MINA</i>            |
| MA | SVD | 9q21.31 | 81.9-82.0   | 84.5kB  | rs10780355 | Y | 2.21 | -                                    |
| MA | SVD | 11q23.1 | 111.7-111.8 | 90.1kB  | rs10502156 | Y | 1.91 | -                                    |

Abbreviations: SNP = single nucleotide polymorphism; Chr = chromosome; MO = migraine without aura; MA = migraine with aura; IS = ischemic stroke; LAS = large artery stroke; CE = cardioembolic; SVD = small vessel disease.
